# Supplementary material for: Surface-enhanced Raman spectroscopy: a half-century historical perspective
Source: Royal Society of Chemistry journal article supplement (doi:10.1039/d4cs00883a), 2024-12-23
Supplement: d4cs00883a1.pdf [file d4cs00883a1.pdf]

**Author contribution statement:**

Z.-Q. Tian organized the structures of the manuscript and conceptualized the key tables and figures and led the whole process of manuscript and funding acquisition. J. Yi (primarily Sec. 4, 5), E.-M. You (primarily Sec. 1, 2) and R. Hu (primarily Sec. 3) co-wrote the main contents of the manuscript and contributed to main visualization, literature investigation and implements. J. Yi incorporated inputs from all authors. D.-Y. Wu wrote Sec. 2.6.6 and 4.4.9, G.-K. Liu wrote Sec. 5.5.3, and joined the whole discussions throughout the manuscript preparation. Z.-L. Yang contributed to Sec. 4.6.1. Y. Gu contributed to Sec. 5.4. Y.-H. Wang contributed to Sec. 5.3. H. Zhang contributed to Sec. 4.4.2. X. Wang and B. Ren wrote Sec. 4.5.4 and contributed to Sec. 4.5.1. H. Ma contributed to Sec. 5.4. J.-Y. Liu wrote Sec. 4.4.5. Y. Yang and J.-H. Tian contributed to Sec. 4.5.6 and Sec. 4.7. F. R. Fan, J.-F. Li contributed to Sec. 4.4 and 4.6.5. B.-W. Mao contributed to Sec. 4.5.1. C. Zhan contributed to 4.4.9. Y. Qiao contributed to Sec. 5.3. H. Wang contributed to 4.5.5. S.-H. Luo contributed to Sec. 5.5.3. Z.-D. Meng contributed visualization and Sec. 5.4.

G. C. Schatz contributed to Sec. 2 and revised the manuscript. J. Aizpurua contributed to Sec. 4.4.6, 4.5.3. V. A. Apkarian wrote Sec. 5.1. J. Baumberg contributed to Sec. 4.5.3. P. N. Bartlett and A. E. Russell contributed to Sec. 2, 3. S. E. J. Bell and Y. Xu contributed to Sec. 5.5. A. G. Brolo contributed to Sec. 4.4.3 and Sec. 5.5. L. E. Brus contributed to Sec. 4.2. R. Frontiera contributed to Sec. 2.5. C. Haynes contributed to Sec. 4.4.3. J. Choo wrote Sec. 5.5.4. L. Cui contributed to Sec. 5.5. V. Deckert contributed to Sec. 4.5.2. Z. Dong, Y. Zhang and Y. Zhang contributed to Sec. 4.5.3, 4.4.9, 5.5.2. S. Duan contributed to Sec. 4.5.3, 5.1. K. Faulds and D. Graham contributed to Sec. 4.7.2 and Sec. 5.6. N. Halas and P. Nordlander wrote 4.4.10 and contributed to Sec. 4.6.1. T. Itoh and Y. Ozaki wrote 4.4.6 and contributed to Sec. 4.6.2. J. Kneipp and K. Kneipp contributed to Sec. 4.2 and Sec. 4.5.6. R. Panneerselvam contributed to Sec. 5.5. E. C. Le Ru contributed to Sec. 4.2 and Sec. 4.7.1. X. Y. Ling contributed to Sec. 5.6. J. Lipkowski contributed to Sec. 2.6.6 and Sec. 5.5. L. M. Liz-Marzán contributed to Sec. 4.4.2, Sec. 4.4.4 and Sec. 5.6. J.-M. Nam contributed to Sec. 4.4.2 and Sec. 5.6. S. Nie contributed to Sec. 4.2 and Sec. 4.4.2. J. Popp contributed to

Sec. 5.5. S. Schlücker wrote to Sec. 5.5.1. Y. Tian contributed to Sec. 5.6. J. Yao contributed to Sec. 4.4.3. L. Tong and J. Zhang wrote the Sec. 4.6.3. H. Xu and Z.-P. Li contributed to Sec. 4.2 and Sec. 5.3.3. L. Yang contributed to Sec. 4.4.4. B. Zhao contributed to Sec. 4.6.2. R. Zenobi contributed to Sec. 4.5.2. All authors contributed to the revision and proof reading of the manuscript.
